# Supplementary material for: Enzymatic polymerization of plant-derived phenols for material-independent and multifunctional coating
Source: Royal Society of Chemistry journal article supplement (doi:10.1039/c3tb21161d), 2013-01-01
Supplement: c3tb21161d.pdf [file c3tb21161d.pdf]

**Figure S1.** AFM images of dopamine- or plant phenol-coated PET films.

**(A) Dopamine**

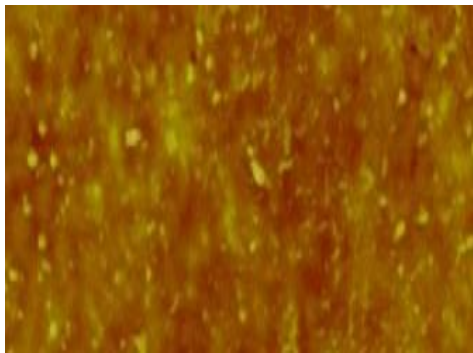

**(B) Catechin/Catechol**

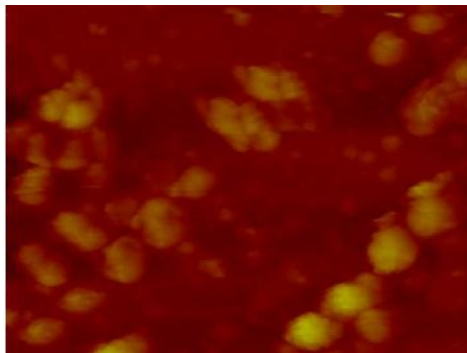

**(C) Ferulic acid/Catechol**

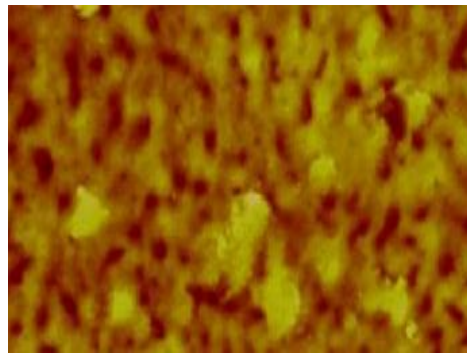

**(D) Catechin/Syringic acid**

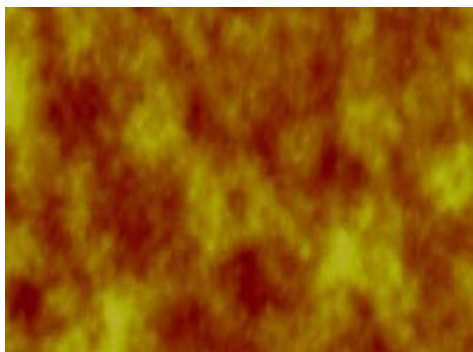

**(E) Tannic acid/Catechol**

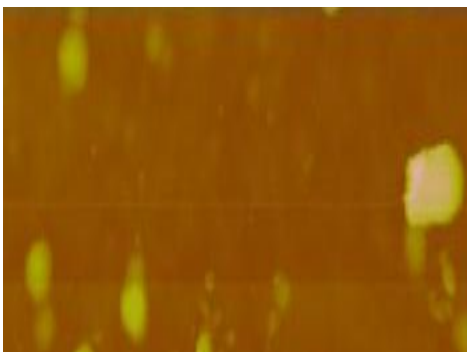

**Figure S2.** AFM image of 1N NaOH-soaked PET film for coating thickness measurement. The representative picture of ferulic acid/catechol-coated PET film is shown.

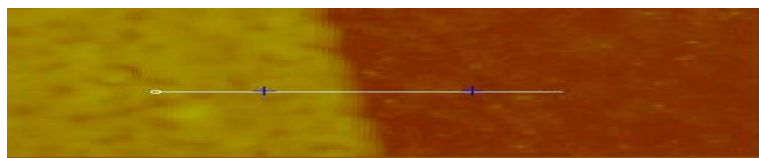

**1N NaOH-soaked surface**

**Figure S3.** Sulfur (S 2p) XPS peak of PET films coated with dopamine or plant phenols with a precursor, 2-dimethylaminoethanethiol for co-immobilization. **(A)** Dopamine; **(B)** Catechin/Catechol; **(C)** Ferulic acid/Catechol; **(D)** Catechin/Syringic acid; **(E)** Tannic acid/Catechol

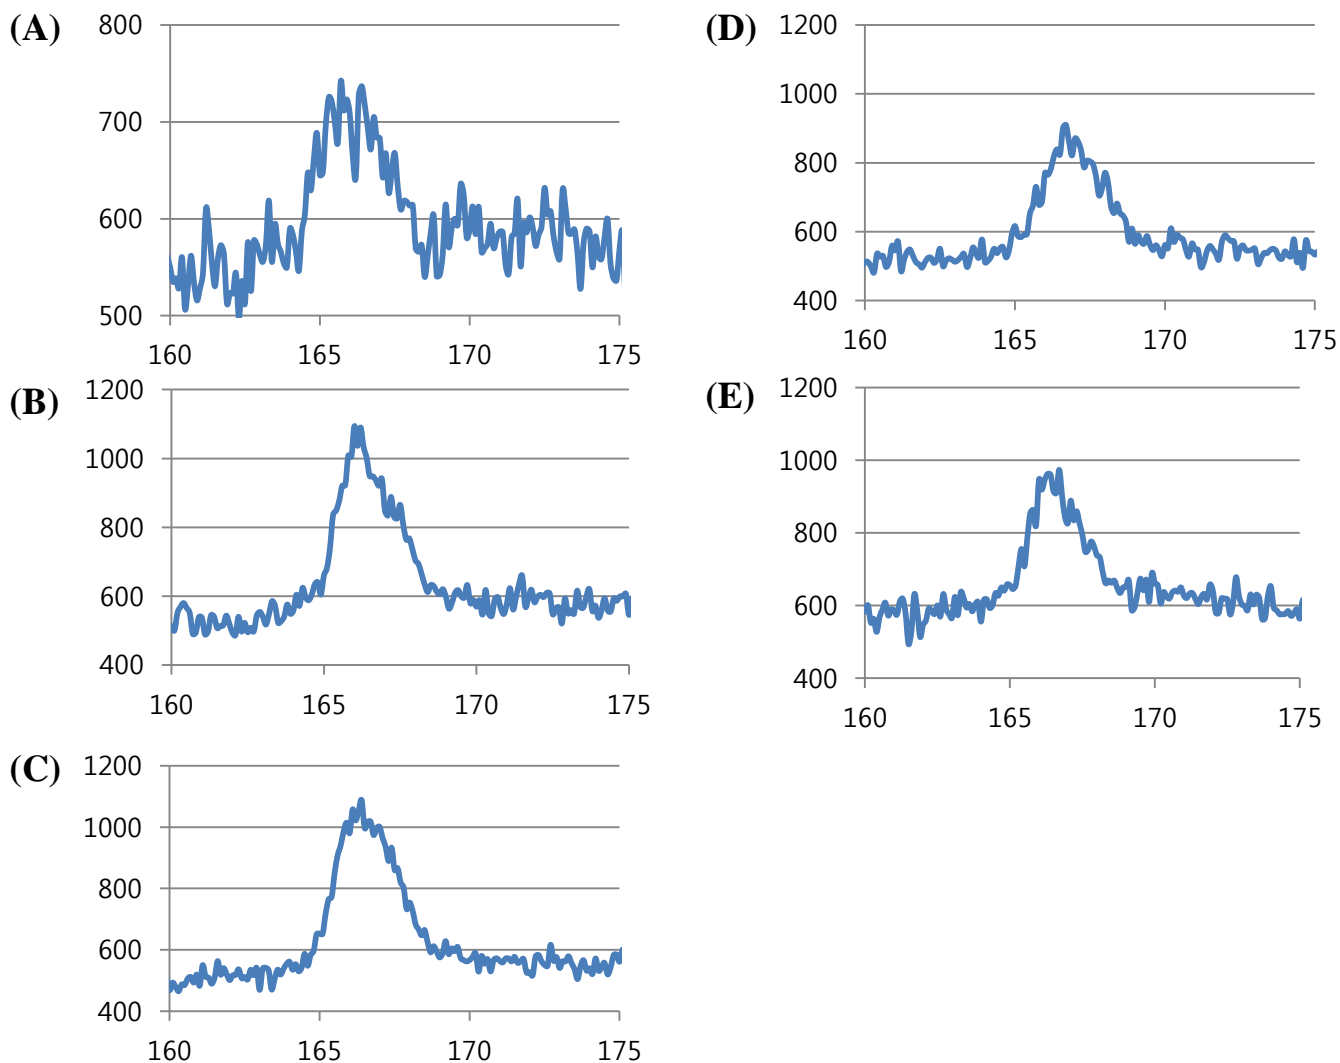

**Table S1.** Water contact angle of dopamine- or plant phenol-coated hydrophobic films shown in Figure 3E. Averages and standard deviations of six-measurement were shown.

|                      | <b>Naïve</b> | <b>Dopamine</b> | <b>Catechin<br/>/Catechol</b> | <b>Ferulic acid<br/>/Catechol</b> | <b>Catechin<br/>/Syringic acid</b> | <b>Tannic acid<br/>/Catechol</b> |
|----------------------|--------------|-----------------|-------------------------------|-----------------------------------|------------------------------------|----------------------------------|
| <b>Polypropylene</b> | 91.2 ± 2.4   | 63.8 ± 2.5      | 69.4 ± 0.9                    | 67.7 ± 3.3                        | 70.4 ± 2.3                         | 65.8 ± 2.8                       |
| <b>PET</b>           | 79.8 ± 0.3   | 52.2 ± 1.7      | 62.9 ± 2.8                    | 55.0 ± 1.8                        | 61.2 ± 1.2                         | 64.8 ± 3.6                       |

**Table S2.** Surface chemical compositions of the dopamine-coated PET films before and after BSA immobilization. The data were obtained from the peak intensities of the XPS spectra shown in Figure 4D-E (first line).

|                             | <b>C 1s (%)</b> | <b>N 1s (%)</b> | <b>O 1s (%)</b> |
|-----------------------------|-----------------|-----------------|-----------------|
| <b>Dopamine coated</b>      | 73.77           | 6.42            | 19.81           |
| <b>BSA post-immobilized</b> | 68.73           | 11.43           | 19.83           |
